# Supplementary material for: Survey of microsatellite clustering in eight fully sequenced species sheds light on the origin of compound microsatellites
Source: PubMed Central journal article supplement (PMC2644718; doi:10.1186/1471-2164-9-612), 2008-12-17
Supplement: 1471-2164-9-612-S1.pdf [file 1471-2164-9-612-S1.pdf]

## **File S1: Standardization of microsatellite motifs and compound microsatellite motifs**

### *Standardization of microsatellite motifs*

Standardization of microsatellite motifs is an important prerequisite for categorizing and comparing of microsatellites. Two standardization intensities were used: partial and full standardization. In the partial standardization, only variations of the motif occurring in a one DNA strand are considered, whereas for the full standardization also the motifs from the reverse complement strand are considered. For example, a poly-CTT, a poly-TCT and a poly-TTC tract have the same partially standardised motif: TTC. By contrast the reverse complement tracts of those simple sequences poly-AAG, poly-AGA and poly-GAA have the partially standardized motif AAG. It is obvious that the poly-AAG and poly-TTC tracts merely represent the plus and minus strand of the same microsatellite, thus, upon full standardization both microsatellite tracts have the same fully standardized motif: AAG.

The identification of the standardized motif is an arbitrary process and has to follow some simple rules. We introduced a 'ATCG-rule': the standardized motif is the variation of a microsatellite motif, which has, within the constraints of the applied standardization intensity, the most 'A'-nucleotides at the beginning (e.g.: AT instead of TA), subsequently the 'T' (e.g.: ATAC instead of ACAT), the 'C' (e.g.: CG instead of GC) and finally the 'G'-nucleotides are considered. This principle is automatically applied in the software SciRoKo (Kofler *et al.*, 2007).

### *Standardization of SSR-couple motifs*

Standardization of SSR-couples (pairs of adjacent ( $d \leq d_{max}$  microsatellite) is far from trivial. Two different microsatellites might be arranged in many different combinations. Consider, for example, a SSR-couple consisting of the two microsatellites  $[AC]_n$  and  $[AG]_m$ . The  $[AG]_m$  microsatellite might be found 5' or 3' of the  $[AC]_n$  microsatellite. Furthermore, the poly-AC tract of the  $[AC]_n$  microsatellite might either be found on the same DNA strand as the poly-AG tract of the  $[AG]_m$  microsatellite, or on the reverse complement strand which contains the poly-TC tract of the  $[AG]_m$  microsatellite.

The standardization of SSR-couple motif requires, in addition to the 'ATCG-rule', the introduction of a new rule, the short motifs first rule. If the 5'-3' arrangement is not considered (depending on the applied standardization intensity, see below) the shortest motif is displayed first (e.g.: C-AG). Four standardization intensities can be used to standardize the motifs of SSR-couples. We depict the motifs of SSR-couples as the motif of the first microsatellite separated from the motif of the second microsatellite by the '-' symbol. Additionally, a shortcut for the applied standardization intensity may be added in front of each SSR-couple

motif. This is necessary because the SSR-couple motifs alone do not relate which standardization intensity was used. The following Table shows the four different standardization intensities and a simple example for each category.

- 'F:' found SSR-couple, no standardization is applied. For example 5'-[GT]<sub>7</sub>-NNN-[GA]<sub>8</sub>-3' is shown as F:GT-GA
- 'PSS:' partial standardization single strand. Both individual microsatellite motifs are partially standardized, the 5'-3' arrangement is considered. For example 5'-[GT]<sub>7</sub>-NNN-[GA]<sub>8</sub>-3' is shown as PSS:TG-AG
- 'PSB:' partial standardization both strands. In addition to the 'PSS' the reverse complement strand 'SSR-Couple' is also considered. Additionally, the 5'-3' arrangement is considered. For example 5'-[GT]<sub>7</sub>-NNN-[GA]<sub>8</sub>-3' is shown as PSB:TC-AC
- 'CS:' conformation standardization. The 5'-3' arrangement is not considered anymore. Both individual microsatellite motifs are partially standardized. For example 5'-[GT]<sub>7</sub>-NNN-[GA]<sub>8</sub>-3' is depicted as CS:AC-TC
- 'FS:' ful standardization. Both individual microsatellite motifs are fully standardized. For example 5'-[GT]<sub>7</sub>-NNN-[GA]<sub>8</sub>-3' is depicted as FS:AC-AG. All SSR-couple motifs shown in this work are fully standardized.

These standardization intensities are automatically applied in the software SciRoKo Kofler *et al.* (2007). The conformation standardized SSR-couple motifs, having both fully standardized microsatellite motifs on the same DNA-strand are said to be in 'plus'-conformation whereas those SSR-couples having the fully standardized motifs on opposite DNA strands are said to be in 'minus'-conformation. For SSR-Couples containing a microsatellite with a self complementary motif only one conformation can be distinguished. Figure 1 demonstrates the relationship of the four different standardization intensities.

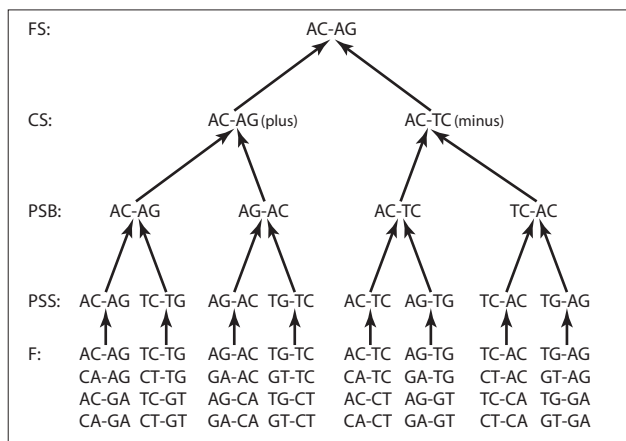

Fig. S 1: Standardization intensities of SSR-couples (automatically applied by SciRoKo). For example, the motif of the SSR-couple 5'-[CT]<sub>7</sub>-[GT]<sub>9</sub>-3' is shown as F:CT-GT; F: found motif; PSS: partial standardized single strand; PSB: partially standardized both strands; CS: conformation standardized; FS: fully standardized
