# Supplementary material for: Survey of microsatellite clustering in eight fully sequenced species sheds light on the origin of compound microsatellites
Source: PubMed Central journal article supplement (PMC2644718; doi:10.1186/1471-2164-9-612), 2008-12-17
Supplement: 1471-2164-9-612-S2.pdf [file 1471-2164-9-612-S2.pdf]

Table S 1: Frequency of compound microsatellites in the 5' and 3' untranslated regions (UTR). SSR: number of microsatellites [count]; comp.: number of compound microsatellites [count]; cSSR: number of individual microsatellites being part of a compound microsatellite [count]; c.p.: percentage of individual microsatellites being part of a compound microsatellite [%]; ms.d.: microsatellite density [SSR/Mbp]; co.d.: compound microsatellite density [comp./Mbp]; *H. sap.*: *Homo sapiens*; *M. mul.*: *Macaca mulatta*; *M. mus.*: *Mus musculus*; *R. nor.*: *Rattus norvegicus*; *O. anat.*: *Ornithorhynchus anatinus*; *G. gal.*: *Gallus gallus*; *D. rerio.*: *Danio rerio*; *D. mel.*: *Drosophila melanogaster*

| species         | 5'-UTR |       |      |      |       |       | 3'-UTR |       |      |      |       |       |
|-----------------|--------|-------|------|------|-------|-------|--------|-------|------|------|-------|-------|
|                 | SSR    | comp. | cSSR | c.p. | ms.d. | co.d. | SSR    | comp. | cSSR | c.p. | ms.d. | co.d. |
| <i>H. sap.</i>  | 2718   | 78    | 158  | 5.8  | 293.5 | 8.4   | 7513   | 176   | 371  | 4.9  | 240.5 | 5.6   |
| <i>M. mul.</i>  | 860    | 17    | 34   | 4.0  | 226.8 | 4.5   | 2235   | 34    | 68   | 3.0  | 192.2 | 2.9   |
| <i>M. mus.</i>  | 2261   | 76    | 163  | 7.2  | 330.5 | 11.1  | 10396  | 561   | 1205 | 11.6 | 372.0 | 20.1  |
| <i>R. nor.</i>  | 506    | 8     | 16   | 3.2  | 153.2 | 2.4   | 1815   | 78    | 160  | 8.8  | 258.6 | 11.1  |
| <i>O. anat.</i> | 40     | 1     | 2    | 5.0  | 252.4 | 6.3   | 129    | 1     | 2    | 1.6  | 172.0 | 1.3   |
| <i>G. gal.</i>  | 387    | 11    | 23   | 5.9  | 325.3 | 9.3   | 964    | 16    | 33   | 3.4  | 171.4 | 2.9   |
| <i>D. rerio</i> | 235    | 4     | 8    | 3.4  | 195.1 | 3.3   | 2023   | 38    | 78   | 3.9  | 412.8 | 7.8   |
| <i>D. mel.</i>  | 1529   | 39    | 78   | 5.1  | 403.4 | 10.3  | 2152   | 43    | 91   | 4.2  | 465.3 | 9.3   |

Table S 2: Influence of the microsatellite search settings on the frequency of compound microsatellites in the whole genome and in the coding sequence (cds). search: used microsatellite search setting; S15: search for imperfect microsatellites, required score 15; S20: search for imperfect microsatellites, required score 20; S30: search for imperfect microsatellites, required score 30; L15: search for perfect microsatellites, required microsatellite length 15; SSR: number of microsatellites [count]; comp.: number of compound microsatellites [count]; cSSR: number of individual microsatellites being part of a compound microsatellite [count]; c.p.: percentage of individual microsatellites being part of a compound microsatellite [%]; ms.d.: microsatellite density [SSR/Mbp]; co.d.: compound microsatellite density [comp./Mbp];

| species         | search | whole genome |        |        |      |       |       | cds  |       |      |      |       |       |
|-----------------|--------|--------------|--------|--------|------|-------|-------|------|-------|------|------|-------|-------|
|                 |        | SSR          | comp.  | cSSR   | c.p. | ms.d. | co.d. | SSR  | comp. | cSSR | c.p. | ms.d. | co.d. |
| <i>H. sap.</i>  | S15    | 1169530      | 59792  | 129848 | 11.1 | 413.0 | 21.1  | 4965 | 104   | 233  | 4.7  | 77.4  | 1.6   |
|                 | S20    | 533781       | 19835  | 42359  | 7.9  | 188.5 | 7.0   | 1852 | 30    | 60   | 3.2  | 28.9  | 0.5   |
|                 | S30    | 148233       | 4520   | 9489   | 6.4  | 52.3  | 1.6   | 364  | 5     | 10   | 2.8  | 5.7   | 0.1   |
|                 | L15    | 1140608      | 53693  | 119192 | 10.5 | 402.7 | 19.0  | 4452 | 80    | 180  | 4.0  | 69.4  | 1.3   |
| <i>M. mul.</i>  | S15    | 1178381      | 61407  | 134455 | 11.4 | 445.3 | 23.2  | 3638 | 64    | 139  | 3.8  | 71.3  | 1.3   |
|                 | S20    | 560975       | 21523  | 47007  | 8.4  | 212.0 | 8.1   | 1421 | 25    | 55   | 3.9  | 27.9  | 0.5   |
|                 | S30    | 145843       | 5740   | 12383  | 8.5  | 55.1  | 2.2   | 240  | 10    | 21   | 8.8  | 4.7   | 0.2   |
|                 | L15    | 1156605      | 56509  | 127678 | 11.0 | 437.1 | 21.4  | 3331 | 51    | 118  | 3.5  | 65.3  | 1.0   |
| <i>M. mus.</i>  | S15    | 1574180      | 173535 | 398361 | 25.3 | 617.9 | 68.1  | 3995 | 95    | 202  | 5.1  | 72.5  | 1.7   |
|                 | S20    | 1004216      | 106505 | 240813 | 24.0 | 394.2 | 41.8  | 1634 | 34    | 74   | 4.5  | 29.7  | 0.6   |
|                 | S30    | 599913       | 55686  | 121539 | 20.3 | 235.5 | 21.9  | 407  | 9     | 19   | 4.7  | 7.4   | 0.2   |
|                 | L15    | 1651039      | 165166 | 399941 | 24.2 | 648.1 | 64.8  | 3601 | 79    | 174  | 4.8  | 65.4  | 1.4   |
| <i>R. nor.</i>  | S15    | 1307474      | 133120 | 291304 | 22.3 | 527.8 | 53.7  | 1883 | 92    | 226  | 12.0 | 92.6  | 4.5   |
|                 | S20    | 854201       | 81448  | 173568 | 20.3 | 344.9 | 32.9  | 977  | 62    | 145  | 14.8 | 48.0  | 3.1   |
|                 | S30    | 549654       | 38430  | 79186  | 14.4 | 221.9 | 15.5  | 474  | 29    | 64   | 13.5 | 23.3  | 1.4   |
|                 | L15    | 1349861      | 122418 | 281760 | 20.9 | 545.0 | 49.4  | 1895 | 88    | 233  | 12.3 | 93.2  | 4.3   |
| <i>O. anat.</i> | S15    | 133984       | 1913   | 3969   | 3.0  | 327.2 | 4.7   | 1535 | 16    | 34   | 2.2  | 42.8  | 0.5   |
|                 | S20    | 37913        | 555    | 1162   | 3.1  | 92.6  | 1.4   | 288  | 4     | 8    | 2.8  | 8.0   | 0.1   |
|                 | S30    | 7352         | 115    | 240    | 3.3  | 18.0  | 0.3   | 69   | 1     | 2    | 2.9  | 1.9   | 0.0   |
|                 | L15    | 123136       | 1558   | 3288   | 2.7  | 300.7 | 3.8   | 1469 | 16    | 32   | 2.2  | 41.0  | 0.5   |
| <i>G. gal.</i>  | S15    | 233896       | 8532   | 17989  | 7.7  | 237.5 | 8.7   | 1889 | 36    | 77   | 4.1  | 58.3  | 1.1   |
|                 | S20    | 84703        | 2614   | 5673   | 6.7  | 86.0  | 2.7   | 532  | 10    | 22   | 4.1  | 16.4  | 0.3   |
|                 | S30    | 17946        | 1033   | 2279   | 12.7 | 18.2  | 1.1   | 74   | 3     | 6    | 8.1  | 2.3   | 0.1   |
|                 | L15    | 225984       | 8045   | 17629  | 7.8  | 229.5 | 8.2   | 1658 | 21    | 45   | 2.7  | 51.2  | 0.7   |
| <i>D. rerio</i> | S15    | 1048258      | 94159  | 225069 | 21.5 | 688.1 | 61.8  | 3215 | 86    | 180  | 5.6  | 72.0  | 1.9   |
|                 | S20    | 598925       | 57277  | 133966 | 22.4 | 393.2 | 37.6  | 1205 | 25    | 52   | 4.3  | 27.0  | 0.6   |
|                 | S30    | 349068       | 28067  | 63452  | 18.2 | 229.2 | 18.4  | 317  | 2     | 5    | 1.6  | 7.1   | 0.0   |
|                 | L15    | 1107628      | 87463  | 220899 | 19.9 | 727.1 | 57.4  | 2907 | 67    | 140  | 4.8  | 65.1  | 1.5   |
| <i>D. mel.</i>  | S15    | 44600        | 714    | 1457   | 3.3  | 376.9 | 6.0   | 4168 | 105   | 213  | 5.1  | 145.6 | 3.7   |
|                 | S20    | 15471        | 113    | 230    | 1.5  | 130.7 | 1.0   | 1591 | 14    | 29   | 1.8  | 55.6  | 0.5   |
|                 | S30    | 1724         | 4      | 8      | 0.5  | 14.6  | 0.0   | 212  | 0     | 0    | 0.0  | 7.4   | 0.0   |
|                 | L15    | 41264        | 645    | 1317   | 3.2  | 348.7 | 5.5   | 3573 | 81    | 165  | 4.6  | 124.8 | 2.8   |

Table S 3: Influence of  $d_{max}$ , for the whole genome of the eight species.  $d_{max}$ : maximum distance between two adjacent microsatellites in order to still account as clustered [bp]; comp.: number of compound microsatellites [count]; cSSR: number of microsatellites being part of a compound microsatellite [count]; c.p.: percentage of microsatellites being part of a compound microsatellite with respect to all microsatellites [%];

|                 | $d_{max}$ [bp] | 1      | 2      | 3      | 4      | 5      | 6      | 7      | 8      | 9      | 10     | 20     | 30     | 40     | 50     | 100    | 200    | 400    |
|-----------------|----------------|--------|--------|--------|--------|--------|--------|--------|--------|--------|--------|--------|--------|--------|--------|--------|--------|--------|
| <i>H. sap.</i>  | comp.          | 40159  | 45085  | 48120  | 50660  | 52849  | 54977  | 56332  | 57605  | 58663  | 59792  | 66454  | 70233  | 73173  | 75750  | 85767  | 116657 | 160716 |
|                 | cSSR           | 84171  | 94960  | 101773 | 107552 | 112722 | 117701 | 121002 | 124178 | 126916 | 129848 | 148756 | 160388 | 169459 | 177199 | 205269 | 282155 | 403161 |
|                 | c.p.           | 7.2    | 8.1    | 8.7    | 9.2    | 9.6    | 10.1   | 10.4   | 10.6   | 10.9   | 11.1   | 12.7   | 13.7   | 14.5   | 15.2   | 17.6   | 24.1   | 34.5   |
| <i>M. mul.</i>  | comp.          | 42581  | 47281  | 50108  | 52612  | 54686  | 56719  | 58064  | 59333  | 60346  | 61407  | 67845  | 71438  | 74245  | 76738  | 86783  | 118826 | 164449 |
|                 | cSSR           | 90250  | 100680 | 107086 | 112870 | 117744 | 122613 | 125948 | 129083 | 131735 | 134455 | 152220 | 162814 | 170798 | 177513 | 202810 | 279667 | 402673 |
|                 | c.p.           | 7.7    | 8.5    | 9.1    | 9.6    | 10.0   | 10.4   | 10.7   | 11.0   | 11.2   | 11.4   | 12.9   | 13.8   | 14.5   | 15.1   | 17.2   | 23.7   | 34.2   |
| <i>M. mus.</i>  | comp.          | 125826 | 136390 | 143639 | 150823 | 157572 | 162183 | 165342 | 168396 | 170911 | 173535 | 189170 | 197858 | 204080 | 209306 | 231413 | 269865 | 317913 |
|                 | cSSR           | 277327 | 303158 | 320967 | 338664 | 355274 | 367413 | 375856 | 384114 | 391020 | 398361 | 444964 | 471945 | 491404 | 507500 | 572444 | 689234 | 863673 |
|                 | c.p.           | 17.6   | 19.3   | 20.4   | 21.5   | 22.6   | 23.3   | 23.9   | 24.4   | 24.8   | 25.3   | 28.3   | 30.0   | 31.2   | 32.2   | 36.4   | 43.8   | 54.9   |
| <i>R. nor.</i>  | comp.          | 94045  | 103361 | 109345 | 115098 | 119908 | 123948 | 126374 | 128886 | 130929 | 133120 | 146147 | 153485 | 158731 | 162853 | 179931 | 209164 | 248240 |
|                 | cSSR           | 199005 | 220211 | 233829 | 247302 | 258401 | 268200 | 274189 | 280489 | 285608 | 291304 | 327680 | 349729 | 365850 | 378664 | 432417 | 519493 | 652846 |
|                 | c.p.           | 15.2   | 16.8   | 17.9   | 18.9   | 19.8   | 20.5   | 21.0   | 21.5   | 21.8   | 22.3   | 25.1   | 26.8   | 28.0   | 29.0   | 33.1   | 39.7   | 49.9   |
| <i>O. anat.</i> | comp.          | 1210   | 1363   | 1479   | 1578   | 1658   | 1714   | 1767   | 1817   | 1868   | 1913   | 2322   | 2588   | 2862   | 3118   | 4536   | 8082   | 13651  |
|                 | cSSR           | 2477   | 2800   | 3041   | 3247   | 3418   | 3541   | 3657   | 3763   | 3871   | 3969   | 4876   | 5498   | 6129   | 6706   | 9958   | 17911  | 31268  |
|                 | c.p.           | 1.9    | 2.1    | 2.3    | 2.4    | 2.6    | 2.6    | 2.7    | 2.8    | 2.9    | 3.0    | 3.6    | 4.1    | 4.6    | 5.0    | 7.4    | 13.4   | 23.3   |
| <i>G. gal.</i>  | comp.          | 5284   | 6067   | 6526   | 6927   | 7298   | 7631   | 7888   | 8154   | 8338   | 8532   | 9903   | 10818  | 11594  | 12264  | 15033  | 19545  | 26864  |
|                 | cSSR           | 10984  | 12628  | 13621  | 14482  | 15272  | 16001  | 16559  | 17139  | 17560  | 17989  | 21111  | 23210  | 24977  | 26516  | 32789  | 43294  | 61726  |
|                 | c.p.           | 4.7    | 5.4    | 5.8    | 6.2    | 6.5    | 6.8    | 7.1    | 7.3    | 7.5    | 7.7    | 9.0    | 9.9    | 10.7   | 11.3   | 14.0   | 18.5   | 26.4   |
| <i>D. rerio</i> | comp.          | 72758  | 78284  | 81514  | 84734  | 86920  | 89002  | 90533  | 91927  | 93060  | 94159  | 100928 | 104882 | 108506 | 111767 | 126116 | 150801 | 173704 |
|                 | cSSR           | 162084 | 176792 | 185425 | 194872 | 201193 | 207682 | 212320 | 217070 | 220897 | 225069 | 256809 | 278833 | 297190 | 313962 | 383001 | 491447 | 610786 |
|                 | c.p.           | 15.5   | 16.9   | 17.7   | 18.6   | 19.2   | 19.8   | 20.3   | 20.7   | 21.1   | 21.5   | 24.5   | 26.6   | 28.4   | 30.0   | 36.5   | 46.9   | 58.3   |
| <i>D. mel.</i>  | comp.          | 291    | 394    | 437    | 482    | 524    | 565    | 609    | 642    | 680    | 714    | 911    | 1082   | 1267   | 1496   | 2553   | 4561   | 6788   |
|                 | cSSR           | 588    | 796    | 883    | 974    | 1060   | 1144   | 1238   | 1307   | 1387   | 1457   | 1870   | 2227   | 2613   | 3087   | 5410   | 10257  | 16459  |
|                 | c.p.           | 1.3    | 1.8    | 2.0    | 2.2    | 2.4    | 2.6    | 2.8    | 2.9    | 3.1    | 3.3    | 4.2    | 5.0    | 5.9    | 6.9    | 12.1   | 23.0   | 36.9   |

Table S 4: Influence of  $d_{max}$ , for the coding sequence of the eight species.  $d_{max}$ : maximum distance between two adjacent microsatellites in order to still account as clustered [bp]; comp.: number of compound microsatellites [count]; cSSR: number of microsatellites being part of a compound microsatellite [count]; c.p.: percentage of microsatellites being part of a compound microsatellite with respect to all microsatellites [%];

|                 | $d_{max}$ [bp] | 1   | 2   | 3   | 4   | 5    | 6    | 7    | 8    | 9    | 10   | 20   | 30   | 40   | 50   | 100  | 200  | 400  |
|-----------------|----------------|-----|-----|-----|-----|------|------|------|------|------|------|------|------|------|------|------|------|------|
| <i>H. sap.</i>  | comp.          | 61  | 72  | 76  | 81  | 82   | 87   | 89   | 96   | 98   | 104  | 137  | 156  | 162  | 178  | 230  | 279  | 339  |
|                 | cSSR           | 131 | 159 | 168 | 179 | 183  | 197  | 201  | 217  | 221  | 233  | 313  | 363  | 376  | 411  | 552  | 683  | 843  |
|                 | c.p.           | 2.6 | 3.2 | 3.4 | 3.6 | 3.7  | 4.0  | 4.1  | 4.4  | 4.5  | 4.7  | 6.3  | 7.3  | 7.6  | 8.3  | 11.1 | 13.8 | 17.0 |
| <i>M. mul.</i>  | comp.          | 44  | 46  | 50  | 52  | 53   | 53   | 55   | 59   | 61   | 64   | 79   | 95   | 96   | 104  | 142  | 164  | 207  |
|                 | cSSR           | 95  | 99  | 108 | 112 | 115  | 116  | 120  | 128  | 133  | 139  | 175  | 213  | 216  | 233  | 333  | 394  | 498  |
|                 | c.p.           | 2.6 | 2.7 | 3.0 | 3.1 | 3.2  | 3.2  | 3.3  | 3.5  | 3.7  | 3.8  | 4.8  | 5.9  | 5.9  | 6.4  | 9.2  | 10.8 | 13.7 |
| <i>M. mus.</i>  | comp.          | 56  | 62  | 66  | 73  | 78   | 79   | 80   | 90   | 93   | 95   | 124  | 148  | 166  | 174  | 224  | 271  | 327  |
|                 | cSSR           | 121 | 133 | 141 | 155 | 165  | 168  | 171  | 191  | 197  | 202  | 271  | 322  | 366  | 388  | 501  | 621  | 758  |
|                 | c.p.           | 3.0 | 3.3 | 3.5 | 3.9 | 4.1  | 4.2  | 4.3  | 4.8  | 4.9  | 5.1  | 6.8  | 8.1  | 9.2  | 9.7  | 12.5 | 15.5 | 19.0 |
| <i>R. nor.</i>  | comp.          | 61  | 70  | 74  | 78  | 80   | 86   | 85   | 92   | 92   | 92   | 110  | 120  | 125  | 128  | 147  | 155  | 176  |
|                 | cSSR           | 143 | 165 | 176 | 184 | 188  | 203  | 204  | 219  | 221  | 226  | 284  | 317  | 339  | 354  | 427  | 468  | 538  |
|                 | c.p.           | 7.6 | 8.8 | 9.4 | 9.8 | 10.0 | 10.8 | 10.8 | 11.6 | 11.7 | 12.0 | 15.1 | 16.8 | 18.0 | 18.8 | 22.7 | 24.9 | 28.6 |
| <i>O. anat.</i> | comp.          | 11  | 12  | 12  | 12  | 12   | 12   | 14   | 16   | 16   | 16   | 23   | 25   | 26   | 27   | 35   | 48   | 68   |
|                 | cSSR           | 23  | 25  | 25  | 25  | 25   | 25   | 30   | 34   | 34   | 34   | 50   | 56   | 60   | 62   | 83   | 122  | 173  |
|                 | c.p.           | 1.5 | 1.6 | 1.6 | 1.6 | 1.6  | 1.6  | 2.0  | 2.2  | 2.2  | 2.2  | 3.3  | 3.7  | 3.9  | 4.0  | 5.4  | 8.0  | 11.3 |
| <i>G. gal.</i>  | comp.          | 18  | 25  | 27  | 28  | 31   | 32   | 32   | 33   | 34   | 36   | 42   | 47   | 50   | 54   | 72   | 84   | 100  |
|                 | cSSR           | 41  | 55  | 59  | 61  | 67   | 69   | 69   | 71   | 73   | 77   | 94   | 105  | 113  | 123  | 172  | 202  | 241  |
|                 | c.p.           | 2.2 | 2.9 | 3.1 | 3.2 | 3.6  | 3.7  | 3.7  | 3.8  | 3.9  | 4.1  | 5.0  | 5.6  | 6.0  | 6.5  | 9.1  | 10.7 | 12.8 |
| <i>D. rerio</i> | comp.          | 49  | 57  | 61  | 62  | 64   | 68   | 68   | 70   | 82   | 86   | 93   | 112  | 128  | 136  | 169  | 220  | 279  |
|                 | cSSR           | 103 | 119 | 127 | 129 | 133  | 141  | 143  | 147  | 172  | 180  | 207  | 245  | 286  | 306  | 402  | 538  | 691  |
|                 | c.p.           | 3.2 | 3.7 | 4.0 | 4.0 | 4.1  | 4.4  | 4.5  | 4.6  | 5.4  | 5.6  | 6.4  | 7.6  | 8.9  | 9.5  | 12.5 | 16.7 | 21.5 |
| <i>D. mel.</i>  | comp.          | 60  | 70  | 78  | 81  | 85   | 89   | 94   | 97   | 100  | 105  | 123  | 136  | 155  | 166  | 237  | 338  | 440  |
|                 | cSSR           | 123 | 143 | 159 | 165 | 173  | 181  | 191  | 197  | 203  | 213  | 255  | 285  | 325  | 350  | 537  | 868  | 1218 |
|                 | c.p.           | 3.0 | 3.4 | 3.8 | 4.0 | 4.2  | 4.3  | 4.6  | 4.7  | 4.9  | 5.1  | 6.1  | 6.8  | 7.8  | 8.4  | 12.9 | 20.8 | 29.2 |

Table S 5: Influence of  $d_{max}$ , for the 5' untranslated region of the eight species.  $d_{max}$ : maximum distance between two adjacent microsatellites in order to still account as clustered [bp]; comp.: number of compound microsatellites [count]; cSSR: number of microsatellites being part of a compound microsatellite [count]; c.p.: percentage of microsatellites being part of a compound microsatellite with respect to all microsatellites [%];

|                 | $d_{max}$ [bp] | 1   | 2   | 3   | 4   | 5   | 6   | 7   | 8   | 9   | 10  | 20  | 30   | 40   | 50   | 100  | 200  | 400  |
|-----------------|----------------|-----|-----|-----|-----|-----|-----|-----|-----|-----|-----|-----|------|------|------|------|------|------|
| <i>H. sap.</i>  | comp.          | 49  | 58  | 61  | 62  | 69  | 69  | 70  | 75  | 78  | 78  | 99  | 115  | 132  | 139  | 185  | 244  | 276  |
|                 | cSSR           | 98  | 116 | 122 | 126 | 140 | 140 | 142 | 152 | 158 | 158 | 205 | 240  | 276  | 295  | 394  | 533  | 611  |
|                 | c.p.           | 3.6 | 4.3 | 4.5 | 4.6 | 5.2 | 5.2 | 5.2 | 5.6 | 5.8 | 5.8 | 7.5 | 8.8  | 10.2 | 10.9 | 14.5 | 19.6 | 22.5 |
| <i>M. mul.</i>  | comp.          | 7   | 8   | 10  | 12  | 13  | 16  | 16  | 16  | 16  | 17  | 25  | 28   | 31   | 35   | 42   | 53   | 58   |
|                 | cSSR           | 14  | 16  | 20  | 24  | 26  | 32  | 32  | 32  | 32  | 34  | 50  | 56   | 62   | 70   | 84   | 108  | 120  |
|                 | c.p.           | 1.6 | 1.9 | 2.3 | 2.8 | 3.0 | 3.7 | 3.7 | 3.7 | 3.7 | 4.0 | 5.8 | 6.5  | 7.2  | 8.1  | 9.8  | 12.6 | 14.0 |
| <i>M. mus.</i>  | comp.          | 40  | 53  | 57  | 59  | 59  | 64  | 65  | 70  | 76  | 76  | 100 | 108  | 116  | 127  | 161  | 205  | 229  |
|                 | cSSR           | 85  | 111 | 123 | 127 | 127 | 137 | 139 | 150 | 162 | 163 | 216 | 235  | 253  | 276  | 355  | 452  | 519  |
|                 | c.p.           | 3.8 | 4.9 | 5.4 | 5.6 | 5.6 | 6.1 | 6.2 | 6.6 | 7.2 | 7.2 | 9.6 | 10.4 | 11.2 | 12.2 | 15.7 | 20.0 | 23.0 |
| <i>R. nor.</i>  | comp.          | 5   | 7   | 7   | 7   | 8   | 8   | 8   | 8   | 8   | 8   | 9   | 12   | 15   | 17   | 22   | 29   | 34   |
|                 | cSSR           | 10  | 14  | 14  | 14  | 16  | 16  | 16  | 16  | 16  | 16  | 20  | 27   | 33   | 37   | 47   | 64   | 74   |
|                 | c.p.           | 2.0 | 2.8 | 2.8 | 2.8 | 3.2 | 3.2 | 3.2 | 3.2 | 3.2 | 3.2 | 4.0 | 5.3  | 6.5  | 7.3  | 9.3  | 12.7 | 14.6 |
| <i>O. anat.</i> | comp.          | 1   | 1   | 1   | 1   | 1   | 1   | 1   | 1   | 1   | 1   | 1   | 1    | 1    | 1    | 1    | 1    | 1    |
|                 | cSSR           | 2   | 2   | 2   | 2   | 2   | 2   | 2   | 2   | 2   | 2   | 2   | 2    | 2    | 2    | 2    | 2    | 2    |
|                 | c.p.           | 5.0 | 5.0 | 5.0 | 5.0 | 5.0 | 5.0 | 5.0 | 5.0 | 5.0 | 5.0 | 5.0 | 5.0  | 5.0  | 5.0  | 5.0  | 5.0  | 5.0  |
| <i>G. gal.</i>  | comp.          | 4   | 7   | 9   | 9   | 9   | 10  | 10  | 11  | 11  | 11  | 18  | 19   | 21   | 22   | 30   | 35   | 36   |
|                 | cSSR           | 8   | 14  | 18  | 18  | 18  | 20  | 20  | 22  | 23  | 23  | 37  | 40   | 44   | 46   | 62   | 72   | 77   |
|                 | c.p.           | 2.1 | 3.6 | 4.7 | 4.7 | 4.7 | 5.2 | 5.2 | 5.7 | 5.9 | 5.9 | 9.6 | 10.3 | 11.4 | 11.9 | 16.0 | 18.6 | 19.9 |
| <i>D. rerio</i> | comp.          | 2   | 2   | 2   | 3   | 3   | 3   | 3   | 4   | 4   | 4   | 4   | 5    | 5    | 5    | 6    | 11   | 12   |
|                 | cSSR           | 4   | 4   | 4   | 6   | 6   | 6   | 6   | 8   | 8   | 8   | 8   | 10   | 10   | 10   | 12   | 22   | 25   |
|                 | c.p.           | 1.7 | 1.7 | 1.7 | 2.6 | 2.6 | 2.6 | 2.6 | 3.4 | 3.4 | 3.4 | 3.4 | 4.3  | 4.3  | 4.3  | 5.1  | 9.4  | 10.6 |
| <i>D. mel.</i>  | comp.          | 20  | 21  | 24  | 25  | 28  | 28  | 36  | 36  | 38  | 39  | 47  | 52   | 64   | 75   | 102  | 146  | 185  |
|                 | cSSR           | 40  | 42  | 48  | 50  | 56  | 56  | 72  | 72  | 76  | 78  | 95  | 105  | 129  | 152  | 213  | 318  | 417  |
|                 | c.p.           | 2.6 | 2.8 | 3.1 | 3.3 | 3.7 | 3.7 | 4.7 | 4.7 | 5.0 | 5.1 | 6.2 | 6.9  | 8.4  | 9.9  | 13.9 | 20.8 | 27.3 |

Table S 6: Influence of  $d_{max}$ , for the 3' untranslated region of the eight species.  $d_{max}$ : maximum distance between two adjacent microsatellites in order to still account as clustered [bp]; comp.: number of compound microsatellites [count]; cSSR: number of microsatellites being part of a compound microsatellite [count]; c.p.: percentage of microsatellites being part of a compound microsatellite with respect to all microsatellites [%];

|                 | $d_{max}$ [bp] | 1   | 2   | 3   | 4    | 5    | 6    | 7    | 8    | 9    | 10   | 20   | 30   | 40   | 50   | 100  | 200  | 400  |
|-----------------|----------------|-----|-----|-----|------|------|------|------|------|------|------|------|------|------|------|------|------|------|
| <i>H. sap.</i>  | comp.          | 111 | 122 | 140 | 150  | 159  | 163  | 168  | 168  | 173  | 176  | 199  | 216  | 222  | 239  | 311  | 449  | 687  |
|                 | cSSR           | 230 | 253 | 290 | 311  | 332  | 341  | 351  | 353  | 364  | 371  | 419  | 457  | 472  | 509  | 670  | 981  | 1518 |
|                 | c.p.           | 3.1 | 3.4 | 3.9 | 4.1  | 4.4  | 4.5  | 4.7  | 4.7  | 4.8  | 4.9  | 5.6  | 6.1  | 6.3  | 6.8  | 8.9  | 13.1 | 20.2 |
| <i>M. mul.</i>  | comp.          | 16  | 22  | 23  | 24   | 27   | 29   | 30   | 31   | 34   | 34   | 44   | 51   | 55   | 56   | 78   | 119  | 149  |
|                 | cSSR           | 32  | 44  | 46  | 48   | 54   | 58   | 60   | 62   | 68   | 68   | 88   | 102  | 110  | 112  | 156  | 255  | 324  |
|                 | c.p.           | 1.4 | 2.0 | 2.1 | 2.2  | 2.4  | 2.6  | 2.7  | 2.8  | 3.0  | 3.0  | 3.9  | 4.6  | 4.9  | 5.0  | 7.0  | 11.4 | 14.5 |
| <i>M. mus.</i>  | comp.          | 384 | 427 | 451 | 474  | 492  | 506  | 526  | 540  | 549  | 561  | 637  | 692  | 741  | 768  | 878  | 1121 | 1438 |
|                 | cSSR           | 801 | 897 | 950 | 1005 | 1048 | 1082 | 1124 | 1157 | 1177 | 1205 | 1394 | 1519 | 1629 | 1697 | 1964 | 2542 | 3371 |
|                 | c.p.           | 7.7 | 8.6 | 9.1 | 9.7  | 10.1 | 10.4 | 10.8 | 11.1 | 11.3 | 11.6 | 13.4 | 14.6 | 15.7 | 16.3 | 18.9 | 24.5 | 32.4 |
| <i>R. nor.</i>  | comp.          | 55  | 59  | 63  | 66   | 67   | 69   | 71   | 73   | 76   | 78   | 87   | 102  | 111  | 114  | 129  | 155  | 186  |
|                 | cSSR           | 113 | 121 | 129 | 135  | 137  | 141  | 146  | 150  | 156  | 160  | 182  | 213  | 232  | 242  | 275  | 338  | 428  |
|                 | c.p.           | 6.2 | 6.7 | 7.1 | 7.4  | 7.6  | 7.8  | 8.0  | 8.3  | 8.6  | 8.8  | 10.0 | 11.7 | 12.8 | 13.3 | 15.2 | 18.6 | 23.6 |
| <i>O. anat.</i> | comp.          | 0   | 0   | 0   | 1    | 1    | 1    | 1    | 1    | 1    | 1    | 1    | 2    | 2    | 2    | 2    | 4    | 4    |
|                 | cSSR           | 0   | 0   | 0   | 2    | 2    | 2    | 2    | 2    | 2    | 2    | 2    | 4    | 4    | 4    | 4    | 8    | 8    |
|                 | c.p.           | 0.0 | 0.0 | 0.0 | 1.6  | 1.6  | 1.6  | 1.6  | 1.6  | 1.6  | 1.6  | 1.6  | 3.1  | 3.1  | 3.1  | 3.1  | 6.2  | 6.2  |
| <i>G. gal.</i>  | comp.          | 4   | 5   | 7   | 7    | 9    | 11   | 13   | 16   | 16   | 16   | 19   | 24   | 26   | 26   | 37   | 46   | 62   |
|                 | cSSR           | 8   | 10  | 14  | 14   | 18   | 22   | 26   | 32   | 32   | 33   | 39   | 49   | 53   | 53   | 78   | 96   | 137  |
|                 | c.p.           | 0.8 | 1.0 | 1.5 | 1.5  | 1.9  | 2.3  | 2.7  | 3.3  | 3.3  | 3.4  | 4.1  | 5.1  | 5.5  | 5.5  | 8.1  | 10.0 | 14.2 |
| <i>D. rerio</i> | comp.          | 23  | 24  | 29  | 30   | 31   | 32   | 34   | 35   | 35   | 38   | 44   | 46   | 52   | 58   | 99   | 144  | 207  |
|                 | cSSR           | 47  | 50  | 60  | 62   | 64   | 66   | 70   | 72   | 72   | 78   | 91   | 98   | 111  | 123  | 210  | 314  | 478  |
|                 | c.p.           | 2.3 | 2.5 | 3.0 | 3.1  | 3.2  | 3.3  | 3.5  | 3.6  | 3.6  | 3.9  | 4.5  | 4.8  | 5.5  | 6.1  | 10.4 | 15.5 | 23.6 |
| <i>D. mel.</i>  | comp.          | 17  | 25  | 27  | 31   | 33   | 34   | 39   | 39   | 42   | 43   | 58   | 70   | 82   | 96   | 149  | 233  | 304  |
|                 | cSSR           | 34  | 50  | 54  | 63   | 69   | 71   | 81   | 82   | 88   | 91   | 122  | 146  | 170  | 199  | 328  | 530  | 742  |
|                 | c.p.           | 1.6 | 2.3 | 2.5 | 2.9  | 3.2  | 3.3  | 3.8  | 3.8  | 4.1  | 4.2  | 5.7  | 6.8  | 7.9  | 9.3  | 15.2 | 24.6 | 34.5 |

Table S 7: Size distribution of compound microsatellites in the 5'-UTR and 3'-UTR. The size refers to the number of individual microsatellites composing the compound microsatellite. All values are in counts. c.s.: compound microsatellite size [#SSR/compound]

|                 | 5'-UTR |   |   |    | 3'-UTR |    |   |    |
|-----------------|--------|---|---|----|--------|----|---|----|
|                 | 2      | 3 | 4 | >4 | 2      | 3  | 4 | >4 |
| <i>H. sap.</i>  | 76     | 2 | 0 | 0  | 160    | 14 | 1 | 1  |
| <i>M. mul.</i>  | 17     | 0 | 0 | 0  | 34     | 0  | 0 | 0  |
| <i>M. mus.</i>  | 68     | 5 | 3 | 0  | 493    | 57 | 8 | 3  |
| <i>R. nor.</i>  | 8      | 0 | 0 | 0  | 74     | 4  | 0 | 0  |
| <i>O. anat.</i> | 1      | 0 | 0 | 0  | 1      | 0  | 0 | 0  |
| <i>G. gal.</i>  | 10     | 1 | 0 | 0  | 15     | 1  | 0 | 0  |
| <i>D. rerio</i> | 4      | 0 | 0 | 0  | 37     | 0  | 1 | 0  |
| <i>D. mel.</i>  | 39     | 0 | 0 | 0  | 38     | 5  | 0 | 0  |

Table S 8: Overrepresentation of SSR-couples and statistical significance thereof in the 5'-UTR and 3'-UTR. obs.: observed number of SSR-couples [count]; exp.: expected number of SSR-couples with respect to a random distribution of microsatellites within DNA sequence space [count]; or.: overrepresentation of SSR-couples [ratio]; P: statistical significance using a Poisson Distribution

|                 | 5'-UTR |      |     |       | 3'-UTR |      |     |                |
|-----------------|--------|------|-----|-------|--------|------|-----|----------------|
|                 | obs.   | exp. | or. | P     | obs.   | exp. | or. | P              |
| <i>H. sap.</i>  | 80     | 7    | 11  | 5E-54 | 194    | 16   | 12  | 0 <sup>1</sup> |
| <i>M. mul.</i>  | 17     | 2    | 9   | 1E-12 | 34     | 3.93 | 8   | 1E-21          |
| <i>M. mus.</i>  | 86     | 7    | 12  | 9E-62 | 642    | 37   | 17  | 0 <sup>1</sup> |
| <i>R. nor.</i>  | 8      | 1    | 11  | 1E-07 | 82     | 4    | 18  | 4E-73          |
| <i>O. anat.</i> | 1      | 0.1  | 10  | 4E-03 | 1      | 0.2  | 5   | 2E-02          |
| <i>G. gal.</i>  | 12     | 1    | 10  | 7E-10 | 17     | 2    | 11  | 8E-14          |
| <i>D. rerio</i> | 4      | 0.4  | 9   | 8E-05 | 40     | 8    | 5   | 6E-17          |
| <i>D. mel.</i>  | 39     | 6    | 7   | 4E-20 | 48     | 9    | 5   | 1E-19          |

---

<sup>1</sup> $p < 1E - 99$



Table S 9: Features and probable genesis of the most abundant SSR-couples in the 5'-UTR. motif: SSR-couple motif (see text); obs.: observed number of SSR-couples having the given motifs [count]; exp.: expected number of SSR-couples [count]; or.: overrepresentation [ratio]; %plus: percent of the SSR-couples found in the plus-conformation (see Text) [%]. Values in brackets indicate that only the specified conformation is feasible. gen.: suggested genesis of the SSR-couple: c: chance; r: recombination; s: slippage; ?: unknown; -: due to low frequency not annotated

| <i>H. sapiens</i>  |      |      |       |      | <i>M. mulatta</i>      |      |                   |       |      |
|--------------------|------|------|-------|------|------------------------|------|-------------------|-------|------|
| motif              | obs. | or.  | %plus | gen. | motif                  | obs. | or.               | %plus | gen. |
| AGC-CCG            | 14   | 50   | 57    | s    | ACTG-AGCC              | 2    | > 10 <sup>4</sup> | 0     | -    |
| AC-AG              | 8    | 498  | 13    | s    | AGC-AGG                | 2    | 103               | 100   | -    |
| AGC-AGCCCC         | 6    | 1805 | 100   | s/?  | AGC-CCG                | 2    | 29                | 50    | -    |
| A-AAAG             | 5    | 531  | 100   | s    | AGG-AAGAGG             | 2    | 1747              | 100   | -    |
| AGG-CCG            | 4    | 10   | 50    | -    | AGG-CCG                | 2    | 21                | 0     | -    |
| AAG-AGG            | 3    | 398  | 100   | -    | A-AG                   | 1    | 72                | 100   | -    |
| CCG-AGCCTC         | 2    | 499  | 100   | -    | AAG-AGG                | 1    | 437               | 100   | -    |
| AC-CG              | 2    | 1847 | 100   | -    | CCCCG-CCCGG            | 1    | 786               | 100   | -    |
| CCG-CCCGG          | 2    | 17   | 50    | -    | A-AAAG                 | 1    | 444               | 100   | -    |
| AGGG-AGGGG         | 2    | 653  | 100   | -    | ACCGGG-AGGCCG          | 1    | > 10 <sup>4</sup> | 100   | -    |
| <i>M. musculus</i> |      |      |       |      | <i>R. norvegicus</i>   |      |                   |       |      |
| AGC-CCG            | 8    | 40   | 38    | s    | AC-CG                  | 2    | 3427              | 100   | -    |
| AC-AG              | 6    | 128  | 33    | s    | AGGG-CCCGG             | 1    | 3290              | 0     | -    |
| AAG-AGC            | 6    | 885  | 100   | s    | AGG-CCG                | 1    | 30                | 0     | -    |
| AGG-CCG            | 4    | 16   | 50    | -    | A-AAT                  | 1    | 7477              | 0     | -    |
| CCG-AGCGGC         | 4    | 152  | 0     | -    | AC-ACGC                | 1    | 3427              | 100   | -    |
| A-AG               | 3    | 47   | 100   | -    | AGC-ACTGCC             | 1    | 3738              | 0     | -    |
| AC-ACAG            | 3    | 343  | 67    | -    | AGC-AGGC               | 1    | 935               | 100   | -    |
| A-AAAG             | 3    | 253  | 100   | -    | -                      | -    | -                 | -     | -    |
| CCG-CCCG           | 2    | 13   | 100   | -    | -                      | -    | -                 | -     | -    |
| CCG-ACCGCC         | 2    | 103  | 100   | -    | -                      | -    | -                 | -     | -    |
| <i>O. anatinus</i> |      |      |       |      | <i>G. gallus</i>       |      |                   |       |      |
| ATCG-AGCG          | 1    | 7884 | 100   | -    | ATCC-ACGG              | 2    | 6565              | 0     | -    |
| -                  | -    | -    | -     | -    | CCG-ACCGC              | 2    | 353               | 100   | -    |
| -                  | -    | -    | -     | -    | CCG-ACGC               | 1    | 882               | 100   | -    |
| -                  | -    | -    | -     | -    | CCCG-AGGCC             | 1    | 1441              | 100   | -    |
| -                  | -    | -    | -     | -    | AGGG-CCCG              | 1    | 1641              | 100   | -    |
| -                  | -    | -    | -     | -    | CCCG-CCGCG             | 1    | 615               | 100   | -    |
| -                  | -    | -    | -     | -    | CCG-CCCGG              | 1    | 22                | 100   | -    |
| -                  | -    | -    | -     | -    | AGC-AGCCGG             | 1    | 3693              | 100   | -    |
| -                  | -    | -    | -     | -    | A-AAAG                 | 1    | 615               | 100   | -    |
| -                  | -    | -    | -     | -    | AAGG-ACGG              | 1    | 1969              | 100   | -    |
| <i>D. rerio</i>    |      |      |       |      | <i>D. melanogaster</i> |      |                   |       |      |
| AAC-ATC            | 1    | 416  | 100   | -    | ACCG-AATCG             | 6    | 4336              | 100   | s/?  |
| AAAT-AAAG          | 1    | 4283 | 100   | -    | AATCT-ATCAG            | 4    | > 10 <sup>4</sup> | 0     | -    |
| AC-AG              | 1    | 22   | 0     | -    | AAC-AGC                | 4    | 33                | 100   | -    |
| AAC-AAG            | 1    | 444  | 100   | -    | AGC-AGG                | 2    | 93                | 100   | -    |
| -                  | -    | -    | -     | -    | ATACG-ATCCG            | 2    | 2349              | 100   | -    |
| -                  | -    | -    | -     | -    | AATCG-ATCCG            | 2    | 723               | 0     | -    |
| -                  | -    | -    | -     | -    | AACTCG-AACGTG          | 2    | > 10 <sup>4</sup> | 100   | -    |
| -                  | -    | -    | -     | -    | AG-ACACG               | 2    | 1236              | 100   | -    |
| -                  | -    | -    | -     | -    | AT-AATAT               | 2    | 1305              | 100   | -    |
| -                  | -    | -    | -     | -    | ATAC-ATATGC            | 1    | 7829              | 100   | -    |

Table S 10: Features and probable genesis of the most abundant SSR-couples in the 3'-UTR. motif: SSR-couple motif (see text); obs.: observed number of SSR-couples having the given motifs [count]; exp.: expected number of SSR-couples [count]; or.: overrepresentation [ratio]; %plus: percent of the SSR-couples found in the plus-conformation (see Text) [%]. Values in brackets indicate that only the specified conformation is feasible. gen: suggested genesis of the SSR-couple: c: chance; r: recombination; s: slippage (m: multi step slippage); ?: unknown; -: due to low frequency not annotated

| <i>H. sapiens</i>  |      |                   |       |      | <i>M. mulatta</i>      |      |                   |       |      |
|--------------------|------|-------------------|-------|------|------------------------|------|-------------------|-------|------|
| motif              | obs. | or.               | %plus | gen. | motif                  | obs. | or.               | %plus | gen. |
| AT-AC              | 36   | 151               | (100) | s    | AC-AG                  | 6    | 179               | 33    | s    |
| AC-AG              | 25   | 192               | 16    | s    | A-AG                   | 3    | 29                | 100   | -    |
| A-AAAAG            | 10   | 61                | 100   | s    | A-AAAAG                | 3    | 74                | 100   | -    |
| A-AAAG             | 9    | 43                | 89    | s    | A-AAAG                 | 3    | 63                | 100   | -    |
| A-AT               | 8    | 13                | (100) | s    | A-A                    | 2    | 2                 | (0)   | -    |
| A-AAAAC            | 6    | 8                 | 100   | s    | AAAC-AAAGAG            | 2    | 3147              | 100   | -    |
| AC-ACGC            | 5    | 493               | 100   | s    | A-AAAAC                | 2    | 10                | 50    | -    |
| AAGG-AGGG          | 5    | 1556              | 100   | s    | AT-AC                  | 2    | 37                | (100) | -    |
| AAAG-AAAG          | 5    | 971               | 100   | s    | AC-ACC                 | 2    | 287               | 100   | -    |
| A-AAAG             | 4    | 37                | 100   | -    | AG-AAT                 | 1    | 201               | 0     | -    |
| <i>M. musculus</i> |      |                   |       |      | <i>R. norvegicus</i>   |      |                   |       |      |
| AC-AG              | 136  | 158               | 33    | s    | AC-AG                  | 19   | 198               | 21    | s    |
| AAAG-AAAG          | 27   | 1078              | 100   | s    | AC-ACGC                | 4    | 486               | 100   | -    |
| A-AAAG             | 22   | 62                | 100   | s    | AC-CG                  | 4    | 1092              | (100) | -    |
| AG-AGGG            | 21   | 325               | 100   | s    | A-AAAG                 | 4    | 80                | 100   | -    |
| AT-AC              | 15   | 26                | (100) | s    | AAGG-AGGG              | 2    | 1464              | 100   | -    |
| AC-ACGC            | 14   | 324               | 100   | s    | A-AAGG                 | 2    | 64                | 50    | -    |
| AC-ACAG            | 14   | 68                | 100   | s    | A-AT                   | 2    | 19                | (100) | -    |
| AAAC-AAAAC         | 14   | 30                | 100   | s    | ATCC-ACGG              | 2    | > 10 <sup>4</sup> | 0     | -    |
| AC-ATAC            | 12   | 92                | 100   | s    | A-AAAAG                | 2    | 100               | 100   | -    |
| A-AAAAC            | 11   | 11                | 100   | s    | AC-ACAG                | 2    | 104               | 100   | -    |
| <i>O. anatinus</i> |      |                   |       |      | <i>G. gallus</i>       |      |                   |       |      |
| C-ACGC             | 1    | > 10 <sup>4</sup> | 100   | -    | A-AAAAC                | 2    | 24                | 100   | -    |
| -                  | -    | -                 | -     | -    | AT-AAAC                | 2    | 72                | (100) | -    |
| -                  | -    | -                 | -     | -    | A-AAC                  | 1    | 25                | 100   | -    |
| -                  | -    | -                 | -     | -    | AAT-AGG                | 1    | 490               | 100   | -    |
| -                  | -    | -                 | -     | -    | A-AAT                  | 1    | 17                | 0     | -    |
| -                  | -    | -                 | -     | -    | AAT-AAAG               | 1    | 414               | 100   | -    |
| -                  | -    | -                 | -     | -    | AT-AC                  | 1    | 75                | (100) | -    |
| -                  | -    | -                 | -     | -    | AAC-AAAAC              | 1    | 111               | 100   | -    |
| -                  | -    | -                 | -     | -    | AATAT-AATAT            | 1    | > 10 <sup>4</sup> | (0)   | -    |
| -                  | -    | -                 | -     | -    | A-AAG                  | 1    | 175               | 100   | -    |
| <i>D. rerio</i>    |      |                   |       |      | <i>D. melanogaster</i> |      |                   |       |      |
| AC-ACGC            | 5    | 196               | 100   | s    | ACC-AGC                | 6    | 556               | 100   | s    |
| AT-AC              | 4    | 16                | (100) | -    | AAC-AGC                | 5    | 129               | 100   | s    |
| AC-AG              | 4    | 19                | 0     | -    | AT-AC                  | 4    | 9                 | (100) | -    |
| A-AT               | 3    | 11                | (100) | -    | AT-ATAC                | 2    | 14                | (100) | -    |
| AT-AAAT            | 2    | 48                | (100) | -    | AGG-ATCCTC             | 2    | 6536              | 0     | -    |
| AC-ACGCCC          | 2    | 1017              | 100   | -    | AGC-ATCCTC             | 2    | 1760              | 0     | -    |
| AAT-AAC            | 2    | 69                | 100   | -    | ATACCC-ACCCAG          | 2    | > 10 <sup>4</sup> | 100   | -    |
| AAT-AAT            | 2    | 19                | (0)   | -    | ATATAC-ATATAG          | 2    | 8473              | 100   | -    |
| AT-AG              | 2    | 35                | (100) | -    | AC-AGG                 | 1    | 29                | 100   | -    |
| A-AG               | 1    | 5                 | 100   | -    | ACAG-ATCGC             | 1    | 7625              | 100   | -    |

Table S 11: Percentage of tri-SSR-compounds having the pattern  $[m1]_n[m2]_m[m1]_o$  where m1 and m2 denote individual microsatellite motifs (partially standardized: file S1). For example:  $[AC]_9[AG]_7[AC]_{16}$

|                        | tested | hits  | %    |
|------------------------|--------|-------|------|
| <i>H. sapiens</i>      | 5 835  | 1 964 | 33.7 |
| <i>M. mulatta</i>      | 6 382  | 1 925 | 29.3 |
| <i>M. musculus</i>     | 26 012 | 9 108 | 35.0 |
| <i>R. norvegicus</i>   | 15 284 | 4 856 | 30.4 |
| <i>O. anatinus</i>     | 102    | 44    | 43.1 |
| <i>G. gallus</i>       | 594    | 184   | 31.0 |
| <i>D. rerio</i>        | 15 284 | 7 041 | 46.1 |
| <i>D. melanogaster</i> | 29     | 9     | 31.0 |
